# Supplementary material
Source: PubMed Central journal article supplement (PMC7489285)
Supplement: NIHMS1623404-supplement-Supplemental_figure_1-2.pdf [file NIHMS1623404-supplement-Supplemental_figure_1-2.pdf]

Supplementary Figures

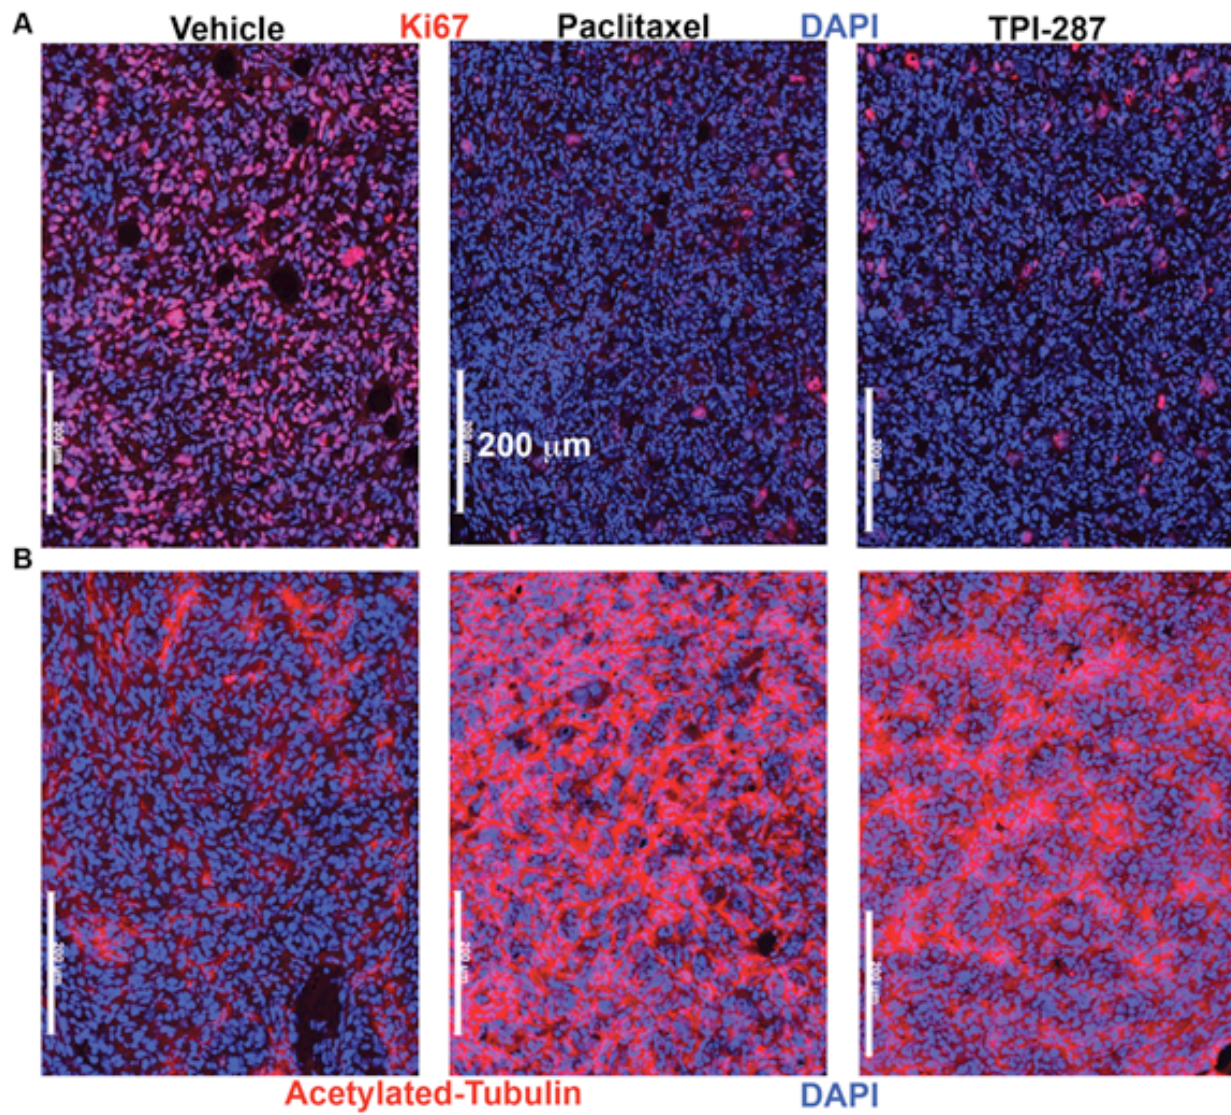

Supplemental Figure 1. Immunofluorescence analysis of primary 231-BR tumors. A. Immunofluorescence for Ki67 (red) in tumors from mice treated with vehicle (left), paclitaxel (middle) or TPI-287 (right). B. Immunofluorescence for acetylated tubulin (red) in tumors described in A. All tumor sections counterstained with DAPI (blue).

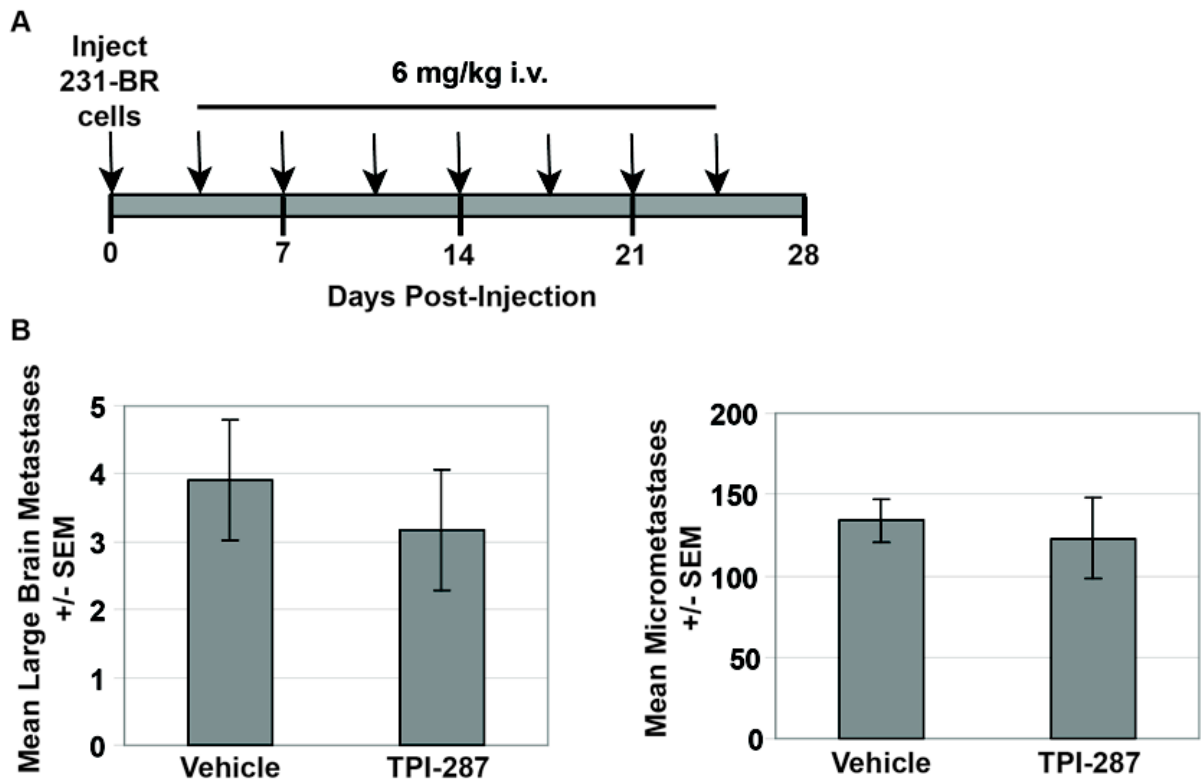

Supplemental Figure 2. TPI-287 prevention of 231-BR brain metastatic colonization. A. Experimental schema in which mice received 231-BR cells in the left cardiac ventricle, and were randomized to twice weekly vehicle or 6 mg/kg TPI-287 beginning on day 4 post-injection. B. Mean number of large brain metastases and micrometastases in histologic counts of ten step sections through one hemisphere of each brain. n=9 mice for vehicle and n=9 for TPI-287. TPI-287 means were not statistically significantly different from vehicle treatment means.
