# Supplementary material
Source: PubMed Central journal article supplement (PMC7489285)
Supplement: NIHMS1623404-supplement-Supplemental_table_1-3.pdf [file NIHMS1623404-supplement-Supplemental_table_1-3.pdf]

Supplementary Tables

**Supplemental Table 1. TPI-287 pharmacokinetic parameters in mice after single intravenous dose.**

---

| Parameter:                  | Brain:   | Plasma:  | Ratio: |
|-----------------------------|----------|----------|--------|
| C <sub>max</sub><br>(ng/ml) | 3726.6   | 1550.2   | 2.40   |
| AUC (0-96 h)<br>(ng-hr/ml)  | 64,984.9 | 16,870.2 | 3.85   |
| MRT<br>(hr)                 | 42.5     | 17.6     | 2.41   |
| CL<br>(ml/hr)               | 0.006    | 0.024    | 0.25   |

---

1. A single intravenous injection of 20 mg/kg TPI-287 was administered to mice and pharmacokinetic parameters calculated from plasma and brain homogenates.

2. C<sub>max</sub>, maximal concentration; AUC, area under the curve; MRT, mean residence time; CL, clearance.

**Supplemental Table 2. Brain/Plasma TPI 287 Concentration Ratios in Mice after a Single 20 mg/kg IV Dose**

---

| <b>Brain/Plasma Concentration Ratio:</b> |                |                |                |                |             |           |
|------------------------------------------|----------------|----------------|----------------|----------------|-------------|-----------|
| <b>Time (hr)</b>                         | <b>Mouse 1</b> | <b>Mouse 2</b> | <b>Mouse 3</b> | <b>Mouse 4</b> | <b>Mean</b> | <b>SD</b> |
| 0.083                                    | 1.586          | 1.233          | 0.984          | 1.044          | 1.212       | 0.271     |
| 0.25                                     | 2.968          | 2.176          | 1.584          | 2.537          | 2.316       | 0.586     |
| 2.0                                      | 2.032          | 3.869          | 3.624          | 3.511          | 3.259       | 0.831     |
| 8.0                                      | 13.707         | 3.857          | 3.893          | 3.000          | 6.114       | 5.079     |
| 24.0                                     | 16.163         | 10.743         | 6.445          | 7.107          | 10.115      | 4.453     |
| 32.0                                     | 11.754         | 13.095         | 15.169         | 7.181          | 11.800      | 3.384     |
| 48.0                                     | 90.601         | 32.147         | 35.674         | 12.142         | 42.641      | 33.611    |
| 72.0                                     | 71.597         | 109.392        | 17.686         | 25.426         | 56.025      | 42.805    |
| 96.0                                     | 48.579         | 105.511        | 22.377         | 78.702         | 63.792      | 36.099    |

**Supplemental Table 3. TPI 287 Concentrations in the normal rat.**

A. TPI 287 Concentrations in Rat Plasma, Brain, and CSF After a Single 20 mg/kg IV Dose

Plasma Concentration (nM)

| <b>Time (hr)</b>                                  | <b>Rats #1, 6, 11</b> | <b>Rats #2, 7, 12</b> | <b>Rats #3, 8, 13</b> | <b>Rats #4, 9, 14</b> | <b>Rats #5, 10, 15</b> | <b>Mean</b> | <b>SD</b> |
|---------------------------------------------------|-----------------------|-----------------------|-----------------------|-----------------------|------------------------|-------------|-----------|
| 0.2                                               | 8613.490              | 12699.817             | 8993.649              | 455.084               | 11530.596              | 10459.388   | 1976.759  |
| 2                                                 | 910.649               | 1587.47               | 1093.502              | 937.552               | 1521.184               | 1210.072    | 322.773   |
| 6                                                 | 273.369               | 313.026               | 422.079               | 389.657               | 253.679                | 330.362     | 73.070    |
| Rat #4, shown in red, was excluded as an outlier. |                       |                       |                       |                       |                        |             |           |

B. Brain TPI 287 Concentrations in Rats After a Single 20 mg/kg IV Dose

Brain Concentration (nM)

| <b>Time (hr)</b>                                  | <b>Rats #1, 6, 11</b> | <b>Rats #2, 7, 12</b> | <b>Rats #3, 8, 13</b> | <b>Rats #4, 9, 14</b> | <b>Rats #5, 10, 15</b> | <b>Mean</b> | <b>SD</b> |
|---------------------------------------------------|-----------------------|-----------------------|-----------------------|-----------------------|------------------------|-------------|-----------|
| 0.25                                              | 4100.318              | 6637.070              | 6332.098              | 86.182                | 4143.134               | 5303.155    | 1369.978  |
| 2                                                 | 3800.679              | 4161.607              | 4730.760              | 4229.314              | 4692.949               | 4323.062    | 390.760   |
| 6                                                 | 4131.079              | 5014.374              | 4177.129              | 4181.375              | 4710.513               | 4442.894    | 398.265   |
| Rat #4, shown in red, was excluded as an outlier. |                       |                       |                       |                       |                        |             |           |

C. CSF TPI 287 Concentrations in Rats After a Single 20 mg/kg IV Dose

CSF Concentration (nM)

| <b>Time (hr)</b> | <b>Rats #1, 6, 11</b> | <b>Rats #2, 7, 12</b> | <b>Rats #3, 8, 13</b> | <b>Rats #4, 9, 14</b> | <b>Rats #5, 10, 15</b> | <b>Mean</b> | <b>SD</b> |
|------------------|-----------------------|-----------------------|-----------------------|-----------------------|------------------------|-------------|-----------|
| 0.25             | 17.885                | 190.955               | BQL                   | NC                    | 12.050                 | 9.978       | 9.121     |
| 2                | BQL                   | BQL                   | BQL                   | BQL                   | BQL                    | BQL         | NC        |
| 6                | BQL                   | BQL                   | BQL                   | BQL                   | BQL                    | BQL         | NC        |

BQL<5.000 ng/mL; Some values may be listed as 0.000 for averaging.

NC = not calculated

Rat #4, shown in red, was excluded as an outlier.

Rat #2, shown in red, was excluded because CSF indicated the presence of blood.

D. Brain/Plasma TPI 287 Concentration Ratios in Rats After a Single 20 mg/kg IV Dose

Brain/Plasma Concentration Ratio

| <b>Time (hr)</b> | <b>Rats #1, 6, 11</b> | <b>Rats #2, 7, 12</b> | <b>Rats #3, 8, 13</b> | <b>Rats #4, 9, 14</b> | <b>Rats #5, 10, 15</b> | <b>Mean</b> | <b>SD</b> |
|------------------|-----------------------|-----------------------|-----------------------|-----------------------|------------------------|-------------|-----------|
| 0.25             | 0.476                 | 0.523                 | 0.704                 | NC                    | 0.359                  | 0.516       | 0.143     |
| 2                | 4.174                 | 2.622                 | 4.326                 | 4.511                 | 3.085                  | 3.743       | 0.838     |
| 6                | 15.112                | 16.019                | 0.897                 | 10.731                | 18.569                 | 14.065      | 3.664     |
